# Supplementary material
Source: MDPI journal article supplement (https://www.mdpi.com/1999-4907/15/5/810)
Supplement: s1 [file s1]

|        |         |             |         |             |             |         |
|--------|---------|-------------|---------|-------------|-------------|---------|
| Street | 550-300 | 700-300     | 550-300 | 700-350     |             |         |
|        | 700-400 | 400-200     | 400-150 | 400-100     |             |         |
|        | 400-150 | No thinning | 700-400 | 700-350     | 400-100     |         |
|        | 550-200 | 550-200     | 400-150 | 400-200     | No thinning | 550-250 |
|        | 550-200 | 700-300     | 400-200 | 550-250     | 700-300     | 400-100 |
|        | 700-400 |             |         | No thinning | 550-250     | 700-350 |
|        |         |             |         |             |             | 550-300 |

**Figure S1.** Diagram of plots distribution and the description of the number of trees per hectare in the first and second thinning of each plot.

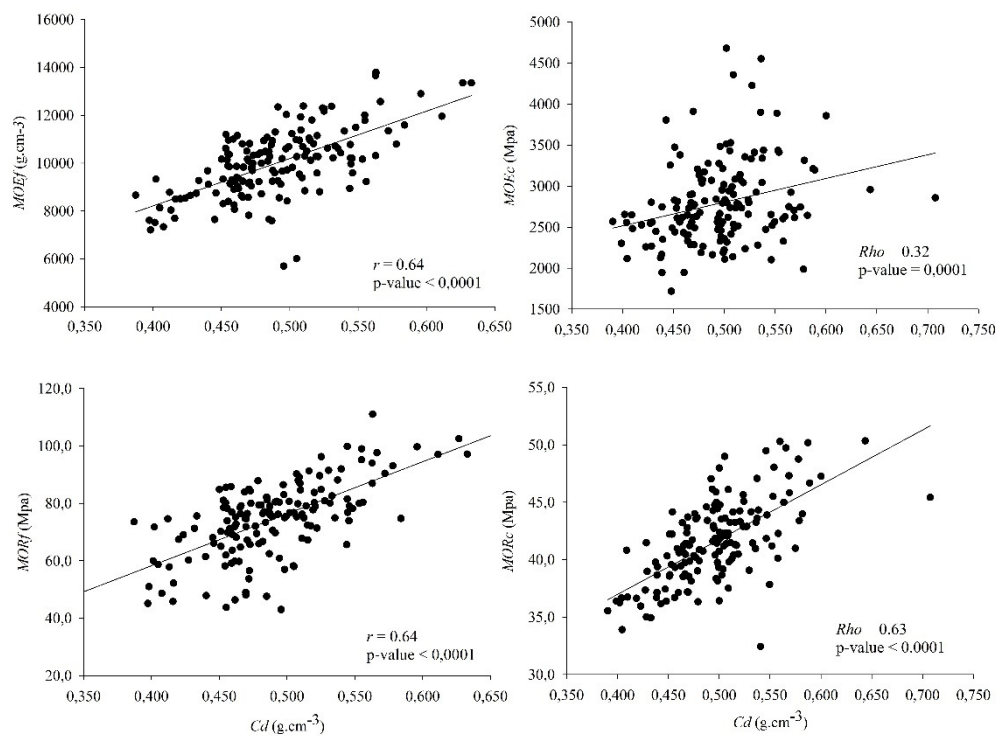

**Figure S2.** Scatter plots between  $Cd$  values versus mechanical parameters for all thinning regimes evaluated.

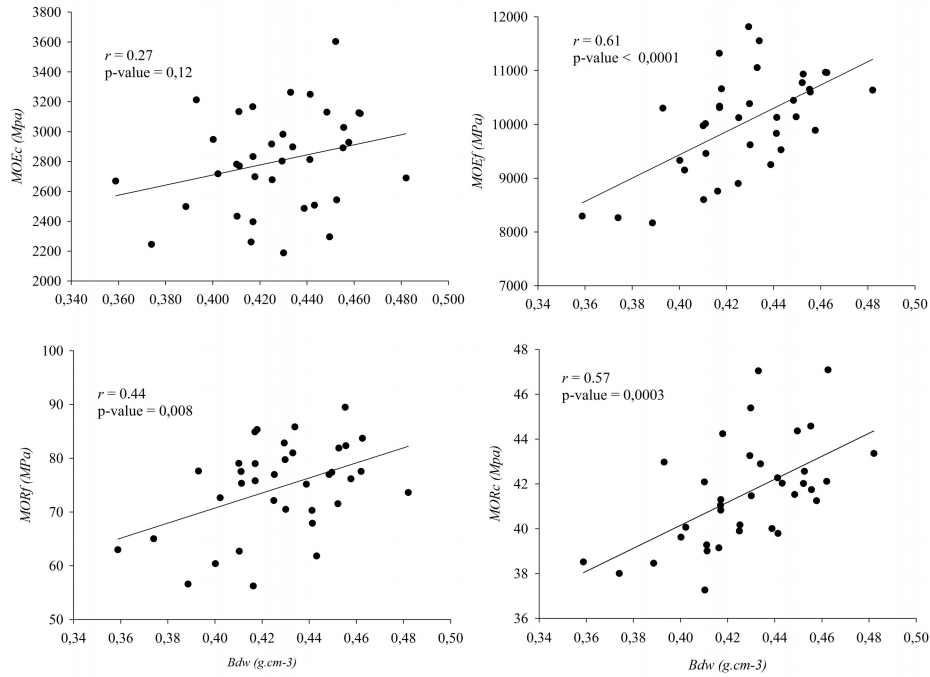

**Figure S3.** Scatter plots between  $Bdw$  values versus mechanical parameters for all thinning regimes evaluated.

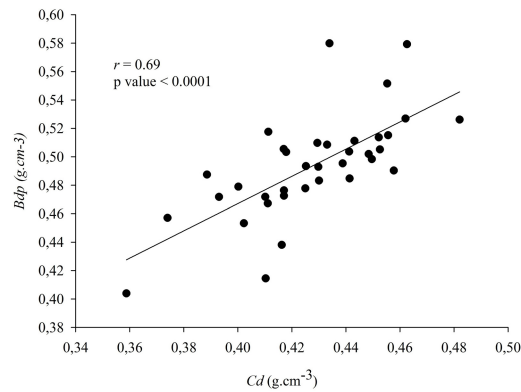

**Figure S4.** Scatter plot between the values of  $Bdw$  and  $Cd$  for all the thinning regimes evaluated.
